# Supplementary material for: Removal of soil biota alters soil feedback effects on plant growth and defense chemistry
Source: PubMed Central journal article supplement (PMC6587519; doi:10.1111/nph.15485), 2018-10-17
Supplement: NPH-221-1478-s001.pdf [file NPH-221-1478-s001.pdf]

## **Removal of soil biota alters soil feedback effects on plant growth and defense chemistry**

Minggang Wang<sup>1,2,3</sup>, Wei-bin Ruan<sup>1,2\*</sup>, Olga Kostenko<sup>2</sup>, Sabrina Carvalho<sup>2</sup>, S. Emilia Hannula<sup>2</sup>, Patrick P.J. Mulder<sup>4</sup>, Fengjiao Bu<sup>5</sup>, Wim H. van der Putten<sup>2,6</sup>, T. Martijn Bezemer<sup>2,7</sup>

<sup>1</sup>College of Life Sciences, Nankai University, Tianjin 300071, China

<sup>2</sup>Netherlands Institute of Ecology (NIOO-KNAW), Department of Terrestrial Ecology, PO Box 50, 6700 AB, Wageningen, The Netherlands

<sup>3</sup>Department of Plant Protection Biology, Swedish University of Agricultural Sciences, PO Box 102, SE-23053 Alnarp, Sweden

<sup>4</sup>RIKILT - Wageningen University & Research, PO Box 230, 6700 AE, Wageningen, The Netherlands

<sup>5</sup>Laboratory of Molecular Biology, Department of Plant Sciences, Wageningen University & Research, Wageningen, Netherlands

<sup>6</sup>Laboratory of Nematology, Wageningen University & Research, PO Box 8123, 6700 ES, Wageningen, The Netherlands

<sup>7</sup>Institute of Biology, Section Plant Ecology and Phytochemistry, Leiden University, PO Box 9505, 2300 RA Leiden, The Netherlands

\*Corresponding author

Wei-bin Ruan

Address: College of Life Sciences, Nankai University, Tianjing 300071, China

Tel: 86-22-2350-4397

Fax: 86-22-2350-8800

Emails for correspondence: [ruanweibin2004@hotmail.com](mailto:ruanweibin2004@hotmail.com)

## Supporting information

**Table S1** PERMANOVA results for effects of soil conditioning<sup>#</sup> (NP, P, P+B and P+A) on the composition of bacterial and fungal communities in each of watery inocula (1000 $\mu$ m, 20 $\mu$ m, 5 $\mu$ m and 0.2 $\mu$ m) and in the whole soil inocula.

| Inocula <sup>a</sup> | Bacterial community |         |                     | Fungal community |         |        |
|----------------------|---------------------|---------|---------------------|------------------|---------|--------|
|                      | R <sup>2</sup> (b)  | P       | Stress <sup>c</sup> | R <sup>2</sup>   | P       | Stress |
| Whole soil           | 0.26                | < 0.05  | 0.07                | 0.25             | < 0.05  | 0.07   |
| 1000 $\mu$ m         | 0.38                | < 0.05  | 0.05                | 0.31             | < 0.005 | 0.12   |
| 20 $\mu$ m           | 0.59                | < 0.001 | 0.06                | 0.35             | < 0.001 | 0.12   |
| 5 $\mu$ m            | 0.47                | < 0.001 | 0.07                | -                | -       | -      |
| 0.2 $\mu$ m          | -                   | -       | -                   | -                | -       | -      |

<sup>#</sup>Soil conditioning treatments includes soil that was not conditioned (NP), soil conditioned by *J. vulgaris* plants (P), or by *J. vulgaris* plants that were exposed to belowground (P+B) or aboveground (P+A) herbivores.

<sup>a</sup>Inocula indicates the soil suspensions that went through 1000  $\mu$ m, 20  $\mu$ m, 5  $\mu$ m, 0.2  $\mu$ m mesh size as well as the whole soil inocula, respectively.

<sup>b</sup>R<sup>2</sup> values represent the proportional variations of bacterial or fungal community composition explained by conditioning treatments.

<sup>c</sup>Stress values represent a measure of “goodness-of-fit” for the NMDS.

**Table S2** ANOVA results for effects of soil conditioning (NP, P, P+B and P+A) and soil inocula (Whole soil, 1000µm, 20µm) on the relative abundances of different plant-associated fungi, including plant pathogens, arbuscular mycorrhizal fungi (AMF) and plant endophytes.

| Treatment                 | <i>df</i> | Plant pathogenic fungi |                | AMF  |                             | Endophytes |                |
|---------------------------|-----------|------------------------|----------------|------|-----------------------------|------------|----------------|
|                           |           | F                      | P              | F    | P                           | F          | P              |
| Conditioning <sup>a</sup> | 3         | 0.50                   | 0.685          | 44.4 | < <b>0.001</b> <sup>c</sup> | 3.68       | <b>0.018</b>   |
| Inocula <sup>b</sup>      | 2         | 115.1                  | < <b>0.001</b> | 17.3 | < <b>0.001</b>              | 171.0      | < <b>0.001</b> |
| Conditioning×Inocula      | 6         | 3.0                    | <b>0.014</b>   | 2.4  | <b>0.041</b>                | 2.59       | <b>0.030</b>   |
| Error                     | 48        |                        |                |      |                             |            |                |

<sup>a</sup>Conditioning treatments includes soil that was not conditioned (NP), soil conditioned by undamaged *J. vulgaris* plants (P), or by *J. vulgaris* plants that were exposed to belowground (P+B) or aboveground (P+A) herbivores.

<sup>b</sup>Inocula indicates the soil suspensions that went through 1000µm, 20µm as well as the whole soil inocula.

<sup>c</sup>Bold p values indicate significant effects at P<0.05.

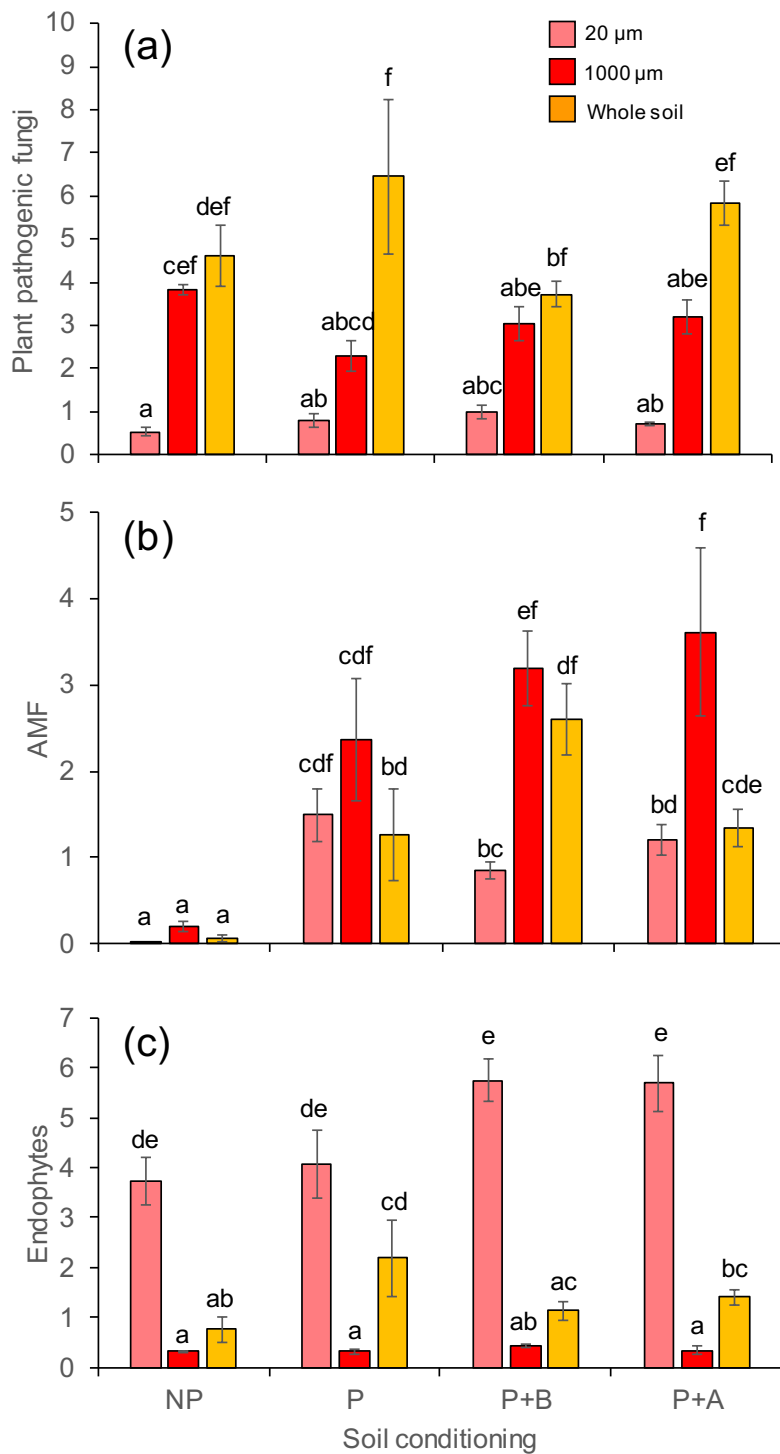

**Fig. S1** Mean ( $\pm$  SE) relative abundances of plant pathogenic fungi (a), arbuscular mycorrhizal fungi (AMF, b) and plant endophytes (c) in 20 $\mu$ m, 1000 $\mu$ m and whole soil inocula that were created from unconditioned soil (NP), soil conditioned by plants (P), by plants exposed to belowground (P+B) or by plants exposed to aboveground (P+A) herbivory. Bars with identical letters are not significantly different based on a Tukey *post hoc* test at  $p < 0.05$  level according to one-way ANOVA. Statistics are shown in Table S2.
